# Supplementary material for: Prato reaction derived polythiophene/C60 donor–acceptor double cable polymer, fabrication of photodetectors and evaluation of photocurrent generation
Source: Royal Society of Chemistry journal article supplement (doi:10.1039/d0tc03344h), 2020-01-01
Supplement: d0tc03344h1.pdf [file d0tc03344h1.pdf]

## Supporting Information

### Prato Reaction Derived Polythiophene/C<sub>60</sub> Donor-Acceptor Double Cable Polymer, Fabrication of Photodetectors and Evaluation of Photocurrent Generation

Sunniya Iftikhar, <sup>a</sup> Nauman Zafar Butt, <sup>b</sup> Raja Shahid Ashraf, <sup>c</sup> Basit Yameen\*<sup>a</sup>

---

*a) Department of Chemistry and Chemical Engineering, Syed Babar Ali School of Science and Engineering (SBASSE), Lahore University of Management Sciences (LUMS), Lahore-54792, Pakistan.*

*b) Department of Electrical Engineering, Syed Babar Ali School of Science and Engineering (SBASSE), Lahore University of Management Sciences (LUMS), Lahore-54792, Pakistan.*

*c) Department of Chemistry, Government College University (GCU), Lahore-54000, Pakistan.*

\*Corresponding author: [basit.yameen@lums.edu.pk](mailto:basit.yameen@lums.edu.pk)

## CONTENTS

|                              |    |
|------------------------------|----|
| 1. Synthetic procedures..... | S1 |
| 2. List of Schemes.....      | S2 |
| 3. List of figures.....      | S3 |

## 1. Synthetic Procedures

### Synthesis of 2-((2,5-dibromothiophen-3-yl)methoxy)tetrahydro-2H-pyran **3**:

2,5-dibromo-3-tetrahydropyranoxyethylthiophene **3** was synthesized by literature reported method (Scheme S1).<sup>1</sup>

### Synthesis of 4-formylbenzoyl chloride (i)

0.25 g (1.7 mmol) of 4-formylbenzoic acid was dissolved in 10 mL of anhydrous THF under inert conditions. The catalytic amount (2-3 drops) of anhydrous DMF was added in the mixture. The reaction mixture was placed on the ice bath and then dropwise added 419  $\mu$ L (4.2 mmol) of oxalyl chloride under inert and ice-cold conditions. The ice bath was removed after 30 minutes and the reaction mixture was stirred overnight at room temperature. The solvent was removed via a rotary evaporator to get concentrated product which was dried under vacuum at room temperature (Scheme S2).<sup>2</sup>

## 2. Schemes

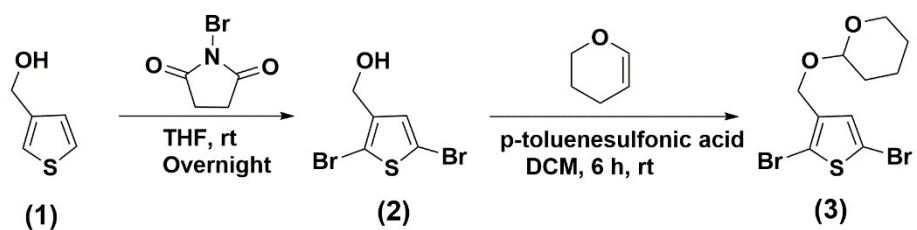

**Scheme S1.** Synthetic route of 2,5-dibromo-3-(tetrahydropyran-2-ylmethoxy)methylthiophene **3**

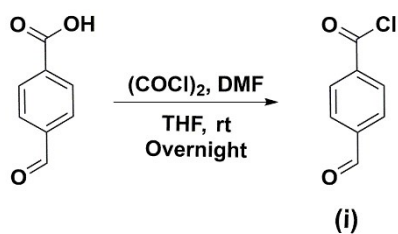

**Scheme S2.** Synthesis of 4-formylbenzoyl chloride (**i**) from 4-formylbenzoic acid

## 3. Figures

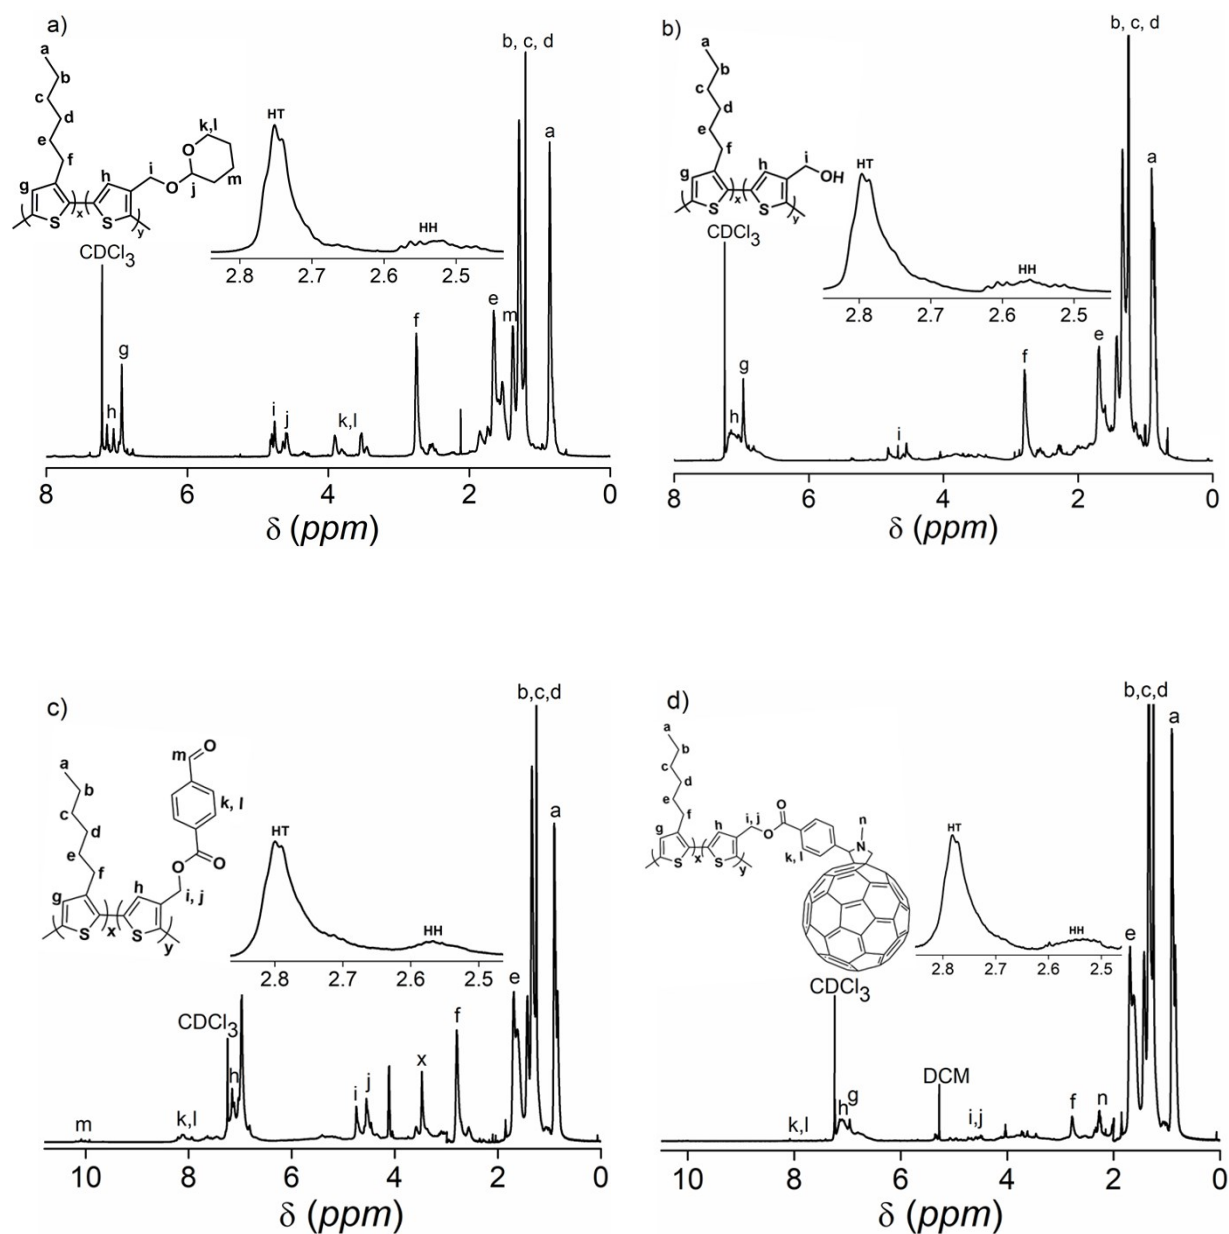

**Figure S1.**  $^1\text{H-NMR}$  spectra and regioregularity analysis (a) copolymer **4** with pendant THP ether groups, (b) copolymer **5** with pendant hydroxyl groups, (c) copolymer **6** with pendant aldehyde groups and (d) copolymer **7** covalent hybrid with  $\text{C}_{60}$

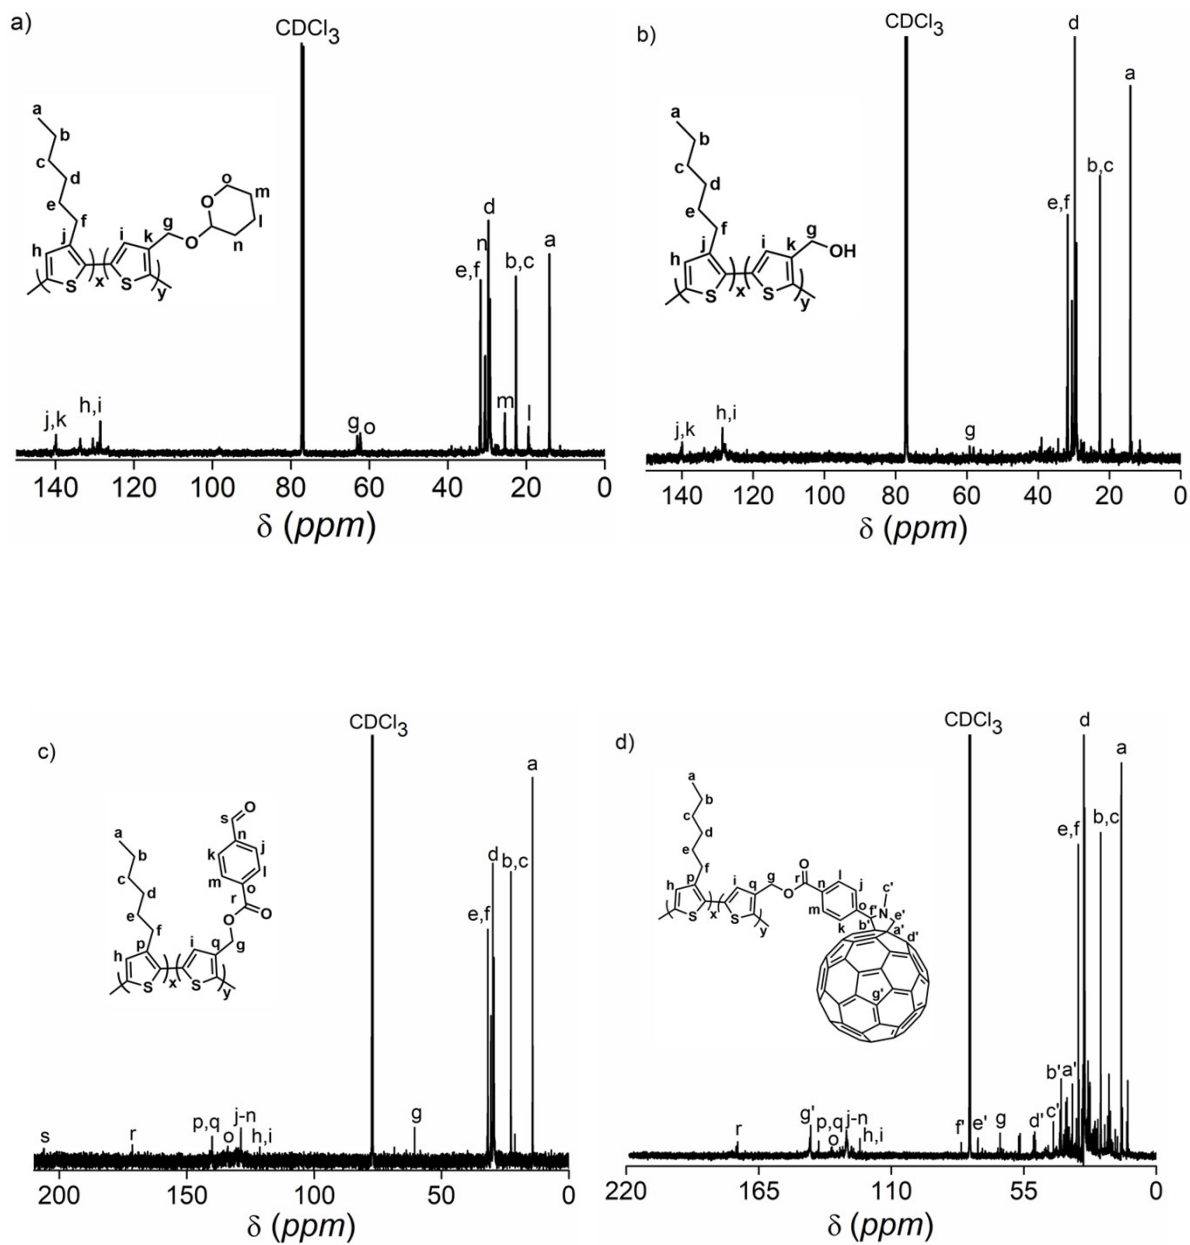

**Figure S2.**  $^{13}\text{C}$ -NMR spectra of (a) copolymer **4** with pendant THP ether groups, (b) copolymer **5** with pendant hydroxyl groups, (c) copolymer **6** with pendant aldehyde groups and (d) copolymer **7**, which is a covalent hybrid of copolymer **6** and  $\text{C}_{60}$

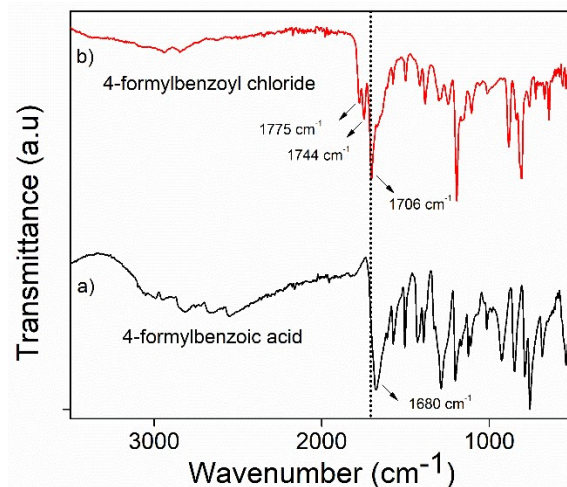

**Figure S3.** FTIR spectra (a) 4-formylbenzoic acid (b) 4-formylbenzoyl chloride (i)

### Gel Permeation Chromatography (GPC)

Gel permeation chromatography (GPC) measurements were carried out by using THF as an eluent with flow rate of 1 mL /min at 35 °C. The GPC profile of statistical random copolymer **4** and copolymer **5** is shown in Figure S4 which clearly depicted the synthesis of copolymer **4** ( $M_n$  12300 Da and  $\bar{D}$ : 1.1) by Grignard metathesis (GRIM) polymerization.

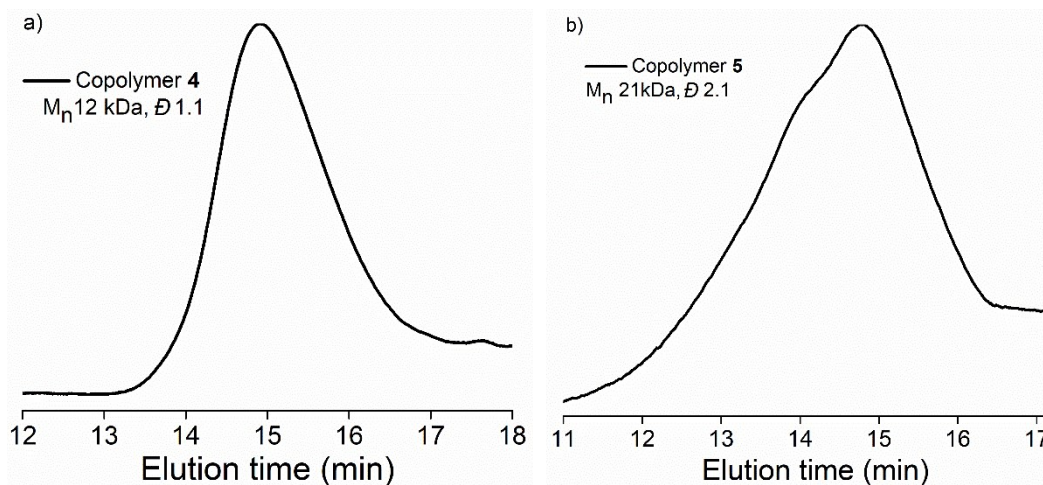

**Figure S4.** GPC profile of copolymer synthesized by Grignard metathesis (GRIM) polymerization (a) copolymer **4** (b) copolymer **5**

## References

1. B. A. Hammer, F. A. Bokel, R. C. Hayward, T. Emrick, *Chem. Mater.*, 2011, **23**, 4250-4256.
2. T. Uchida, Y. Kagoshima, T. Konosu, *Bioorg. Med. Chem. Lett.*, 2009, **19**, 2013-2017.
